# Supplementary material for: Acceptability and Satisfaction of Contraceptive Vaginal Rings in Clinical Studies: A Systematic Review and Narrative Synthesis
Source: Frontiers journal article supplement (doi:10.3389/fgwh.2021.799963), 2021-12-14
Supplement: Data_Sheet_2.pdf [file Data_Sheet_2.pdf]

## Supplementary Material S2 : List of excluded studies, CVR systematic review

|    | Authors names           | Title                                                                                                                                                                       | Year | Journal                                       | Reasons for exclusion                                                                       |
|----|-------------------------|-----------------------------------------------------------------------------------------------------------------------------------------------------------------------------|------|-----------------------------------------------|---------------------------------------------------------------------------------------------|
| 1  | Muller et al.           | Safety, efficacy and quality of life of the novel vaginal contraceptive ring containing etonogestrel/ethinylestradiol 11.0/3.474 mg after 3 years of "real life" experience | 2020 | Eur Rev Med Pharmacol Sci                     | Review                                                                                      |
| 2  | Roy et al               | Original Progesterone vaginal ring as a new contraceptive option for lactating mothers: Evidence from a multicenter non-randomized comparative clinical trial in India      | 2020 | Contraception                                 | Not documenting acceptability/satisfaction (continuation)                                   |
| 3  | Undie Chi-Chi et al     | Choosing and Using the Progesterone Vaginal Ring: Women's Lived Experiences in Three African Cities                                                                         | 2020 | Patient Prefer Adherence                      | Report same study as RamaRaoa 2015 and taken into account                                   |
| 4  | Lu et al                | Qualitative Study of the Contraceptive Effect on Women's Sexual Experiences: Beyond Hormonal Effects                                                                        | 2019 | Obstet Gynecol                                | Not documenting acceptability/satisfaction (Sexual experiences)                             |
| 5  | Murphy, DJ et al.       | Post-use ring weight and residual drug content as potential objective measures of user adherence to a contraceptive progesterone vaginal ring                               | 2019 | Contraception                                 | Not documenting acceptability/satisfaction (adherence)                                      |
| 6  | McLellan-Lemal E et al. | Characteristics of women screened for a contraceptive intravaginal ring study in Kisumu, Kenya, 2014                                                                        | 2016 |                                               | Hypothetical use                                                                            |
| 7  | Das U et al.            | Exploring vaginal ring acceptability for contraception and sexually transmissible infection protection in India: a qualitative research study                               | 2015 | Sexual Health                                 | Hypothetical use                                                                            |
| 8  | Diedrich JT et al.      | Three-year continuation of reversible contraception                                                                                                                         | 2015 | American Journal of Obstetrics and Gynecology | Not documenting acceptability/satisfaction as such (Continuation rates only or pearl index) |
| 9  | Ishaku S et al..        | Progesterone vaginal ring: results of an acceptability study in Nigeria                                                                                                     | 2015 | Abuja, Nigeria, Population Council, 2015 Dec. | Report same study as the one included (RamaRaoa 2015)                                       |
| 10 | Mane B et al..          | [Progesterone vaginal ring: results of an acceptability study in Senegal]                                                                                                   | 2015 | Dakar, Senegal, Population Council, 2015.     | Report same study as RamaRaoa 2015                                                          |
| 11 | Morrow GK et al.        | The Promise of Intravaginal Rings for Prevention: User Perceptions of Biomechanical Properties and Implications for Prevention Product Development                          | 2015 | PLoS One                                      | Not documenting acceptability/satisfaction as such (mechanical properties)                  |
| 12 | Obare F et al.          | Progesterone vaginal ring: results of an acceptability study in Kenya                                                                                                       | 2015 | Dakar, Senegal, Population Council, 2015.     | Report same study as RamaRaoa 2015                                                          |
| 13 | Rosen RK et al.         | Meaning-making matters in product design: users' sensory perceptions and experience evaluations of long-acting vaginal gels and intravaginal rings                          | 2015 | Contraception                                 | Not documenting explicitly acceptability/satisfaction                                       |

|    |                       |                                                                                                                                                 |      |                                                |                                                                                 |  |
|----|-----------------------|-------------------------------------------------------------------------------------------------------------------------------------------------|------|------------------------------------------------|---------------------------------------------------------------------------------|--|
| 14 | Schurmans C et al.    | The ring plus project: safety and acceptability of vaginal rings that protect women from unintended pregnancy                                   | 2015 | BMC Public Health                              | Protocol CVR study                                                              |  |
| 15 | Jost S et al.         | Contraception's choice: Women's opinion, satisfaction and profile: Results of a French national survey of a representative sample of 5963 women | 2014 | Gynecologie Obstetrique & Fertilité            | Not documenting explicitly acceptability/satisfaction                           |  |
| 16 | Lopez LM, et al.      | Skin patch and vaginal ring versus combined oral contraceptives for contraception                                                               | 2013 | Cochrane Database of Systematic Reviews        | Review                                                                          |  |
| 17 | Qian JF               | ARTICLE IN CHINESE [Clinical efficacy and safety of megestrol acetate vaginal ring]                                                             | 2013 | Zhonghua Yi Xue Za Zhi                         | Article in Chinese                                                              |  |
| 18 | Lete I et al.         | Continuation Rate of Combined Hormonal Contraception: A Prospective Multicenter Study                                                           | 2012 | Journal of Womens Health                       | Not documenting explicitly acceptability/satisfaction (Continuation rates only) |  |
| 19 | Lopez LM et al.       | Immediate start of hormonal contraceptives for contraception                                                                                    | 2012 | Cochrane Database of Systematic Reviews        | Review                                                                          |  |
| 20 | Mohamed et al.        | Combined contraceptive ring versus combined oral contraceptive (30-µg ethinylestradiol and 3-mg drospirenone)                                   | 2011 | Int Journal of Gynecology and Obstetrics       | Not documenting acceptability/satisfaction                                      |  |
| 21 | Terrell LR et al.     | Acceptability of the Vaginal Contraceptive Ring Among Adolescent Women                                                                          | 2011 | Journal of Pediatric and Adolescent Gynecology | Hypothetical use                                                                |  |
| 22 | Andelin et al 2010    | Adherence and acceptability of the contraceptive ring compared with the pill among students: a randomized controlled trial                      | 2010 | Obst Gynec                                     | Commentary                                                                      |  |
| 23 | Bustillos-Alamilla E. | [Combined hormonal contraception in cycles artificially extended]                                                                               | 2010 | Ginecologia y Obstetricia de Mexico            | Not found                                                                       |  |
| 24 | Lopez LM et al.       | Skin patch and vaginal ring versus combined oral contraceptives for contraception                                                               | 2010 | Cochrane Database of Systematic Reviews        | Review                                                                          |  |
| 25 | Fait T.               | [Vaginal combined contraception NuvaRing in the clinical practice in the Czech Republic]                                                        | 2009 |                                                | Article in Czek                                                                 |  |
| 26 | Raine TR, et al.      | Attitudes Toward the Vaginal Ring and Transdermal Patch Among Adolescents and Young Women                                                       | 2009 | Journal of Adolescent Health                   | Not documenting acceptability/satisfaction                                      |  |
| 27 | Colwell HH et al.     | The ORTHO BC-SAT--a satisfaction questionnaire for women using hormonal contraceptives                                                          | 2006 |                                                | Validation study                                                                |  |
| 28 | Mathias SD, et al.    | ORTHO birth control satisfaction assessment tool: assessing sensitivity to change and predictors of satisfaction                                | 2006 | Contraception                                  | Validation study                                                                |  |

|    |                                         |                                                                                                                                                                                                     |      |                                                                |                                                                                             |
|----|-----------------------------------------|-----------------------------------------------------------------------------------------------------------------------------------------------------------------------------------------------------|------|----------------------------------------------------------------|---------------------------------------------------------------------------------------------|
| 29 | Victor I & Fink RA.                     | Comparing patient telephone callback rates for different hormonal birth control delivery systems                                                                                                    | 2006 |                                                                | Not found                                                                                   |
| 30 | Miller L, verhoeven C & in't Hout J.    | Extended Regimens of the Contraceptive Vaginal Ring. A Randomized Trial                                                                                                                             | 2005 | Obstetrics & Gynecology                                        | Not documenting explicitly acceptability/satisfaction                                       |
| 31 | Oddsson K                               | Efficacy and safety of a contraceptive vaginal ring (NuvaRing) compared with a combined oral contraceptive: a 1-year randomized trial                                                               | 2005 | Contraception                                                  | Not documenting explicitly acceptability/satisfaction                                       |
| 32 | Weisberg E, Brache V, Alvarez F, et al. | Clinical performance and menstrual bleeding patterns with three dosage combinations of a Nestorone (R) progestogen/ethinyl estradiol contraceptive vaginal ring used on a bleeding-signaled regimen | 2005 | Contraception                                                  | Not documenting explicitly acceptability/satisfaction                                       |
| 33 | Novak A, de la Loge C, & Abetz L.       | Development and validation of an acceptability and satisfaction questionnaire for a contraceptive vaginal ring, NuvaRing                                                                            | 2004 | Pharmacoeconomics                                              | Validation study                                                                            |
| 34 | Sivin I et al.                          | Two-year performance of a Nestorone (R)-releasing contraceptive implant: a three-center study of 300 women                                                                                          | 2004 | Contraception                                                  | Not documenting explicitly acceptability/satisfaction                                       |
| 35 | Book                                    | New Frontiers in Contraceptive Research: A Blueprint for action.                                                                                                                                    | 2003 |                                                                | Full report; BOOK                                                                           |
| 36 | Coren C.                                | Contraceptive ring found safe, effective: most users would recommend it                                                                                                                             | 2003 | Perspectives On Sexual and Reproductive Health                 | No original data/ Not documenting explicitly acceptability/satisfaction                     |
| 37 | Sarkar NN.                              | Steroidal contraceptive vaginal rings                                                                                                                                                               | 2003 | Int Journal of Clinical Practice                               | No original data/Opinion paper                                                              |
| 38 | Dieben TOM, Roumen FJME & Apter D.      | Efficacy, cycle control, and user acceptability of a novel combined contraceptive vaginal ring                                                                                                      | 2002 | Obstetrics and Gynecology                                      | Same study as the one included in the review (Novack 2003°)                                 |
| 39 | Roumen F.                               | Contraceptive efficacy and tolerability with a novel combined contraceptive vaginal ring, NuvaRing                                                                                                  | 2002 | European Journal of Contraception and Reproductive Health Care | Not documenting acceptability/satisfaction as such (Continuation rates only or pearl index) |
| 40 | Szarewski A.                            | High acceptability and satisfaction with NuvaRing use                                                                                                                                               | 2002 | European Journal of Contraception and Reproductive Health Care | Same study as the one included in the review (Novack 2003°)                                 |
| 41 | Massai R et al.                         | Preregistration study on the safety and contraceptive efficacy of a progesterone-releasing vaginal ring in Chilean nursing women                                                                    | 1999 | Contraception                                                  | Not documenting acceptability/satisfaction (pharmacokinetic, safety, efficacy)              |

|    |                                 |                                                                                                                |      |                            |                                                                    |
|----|---------------------------------|----------------------------------------------------------------------------------------------------------------|------|----------------------------|--------------------------------------------------------------------|
| 42 | Chen JH et al.                  | The comparative trial of TCU 380A IUD and progesterone-releasing vaginal ring used by lactating women          | 1998 | Contraception              | Article in Chinese                                                 |
| 43 | Faundes A.                      | Simplifying NFP: preliminary report of a pilot study of the 'collar' method in Brazil                          | 1997 | Advances in Contraception  | Not hormonal CVR                                                   |
| 44 | Weisberg E et al.               | Effect of different insertion regimens on side effects with a combination contraceptive vaginal ring           | 1997 | Contraception              | Report same study (Weisberg 1995)                                  |
| 45 | Ballagh SA.                     | Contraceptive vaginal ring releasing norethindrone acetate and ethinyl estradiol                               | 1994 | Contraception              | Not documenting acceptability/satisfaction as such                 |
| 46 | Olsson SE                       | Contraception with a vaginal ring releasing 3-keto desogestrel and ethinylestradiol                            | 1990 | Contraception              | Not found                                                          |
| 47 | World Health Organization (HRP) | Microdose intravaginal levonorgestrel contraception: a multicentre clinical trial. II. Expulsions and removals | 1990 | Contraception              | Not documenting acceptability/satisfaction (mechanical properties) |
| 48 | Elstein M & Nuttall ID          | The progestagen releasing vaginal ring                                                                         | 1985 | J Obstet Gynaecol (Lahore) | Report same study (Spencer 1986)                                   |
| 49 | Gao J.                          | Clinical investigation of low dose levonorgestrel releasing vaginal ring                                       | 1984 |                            | [Unpublished] [1985] & report same study (Koetsawang 1990)         |
| 50 | Hardy EE et al.                 | The hormonal ring. A new contraceptive gains acceptance                                                        | 1984 | IDRC Rep                   | Report same study (Hardy 1983)                                     |
